# Supplementary material
Source: publisher figshare collection journal article supplement (https://gsapubs.figshare.com/ndownloader/files/22276791)
Supplement: Supplementary file 1 [file 22276791]

## Sheet: Carbonate Cements & Paleosol
Height (m)	Age (Ma)	δ18O (‰, VPDB)	δ13Ccar (‰, VPDB)	δ13Corg (‰,VPDB)
-97	41	-8.65	-3.85	-
-83	40.5	-9.7	-2.86	-26.52
-64	40	-8.33	-2.54	-
0	37.4	-7.56	-1.03	-
1	37.39	-7.51	-1.54	-
37	37.2	-7.56	-2.86	-25.39
45	37.16	-7.5	-2.83	-
47	37.15	-6.64	-2.66	-
76	36.6	-8.63	-4.83	-
148	36.28	-10.59	-3.58	-27.29
166	36.45	-11.12	-2.98	-26.03
184	36.19	-11.29	-3.52	-
196	35.98	-9.77	-3.37	-
215	35.66	-10.76	-3.04	-26.14
251	35.68	-12.54	-2.52	-
255	35.63	-9.96	-2.38	-
259	35.58	-11.48	-1.95	-
292	35.21	-10.92	-0.27	-25.92
325	34.83	-11.37	-4.29	-
326	34.82	-10.6	-1.54	-
355	34.49	-11.06	-3.41	-
432	30.58	-10.26	-1.43	-
456	30.39	-10.09	-1.62	-
530	29.79	-9.1	-1.67	-
598	29.38	-9.68	-2.57	-25.75
659	29.1	-9.86	-1.6	-
692	28.94	-8.84	-1.87	-
735	28.73	-9.07	-1.41	-
767	28.58	-9.54	-1.9	-
824	28.31	-9.33	-1.59	-26.1
857	28.16	-9.34	-2.54	-
887	28.02	-9.41	-2.24	-
929	27.74	-9.61	-1.75	-
956	27.52	-9.16	-1.65	-
1006	27.14	-9.93	-3.08	-
1017	27.06	-9.09	-1.73	-
1062	26.73	-9.86	-1.38	-
1175	26.02	-9.34	-2.12	-
1245	25.7	-9.9	-0.54	-26.04
1263	25.62	-9.7	-3.44	-
1278	25.56	-9.59	-1.11	-
1293	25.49	-10.73	-1.49	-
1336	25.3	-10.13	-3.03	-
1368	25.15	-10.8	-1.88	-26.43
1412	24.91	-9.99	-2.41	-
1416	24.88	-9.81	-2.67	-
1427	24.82	-10.27	-4.13	-
1435	24.77	-11.67	-1.34	-25.64
1449	24.71	-10.45	-2.15	-
1473	24.61	-11.81	-2.55	-
1492	24.54	-12.32	-1.28	-24.19
1517	24.43	-11.37	-0.86	-
1532	24.35	-12.39	-0.8	-
1562	24.2	-10.4	-2.36	-
1584	24.09	-12.35	-2.74	-
1610	23.96	-12.4	-1.74	-
1615	23.93	-12.92	-0.05	-
1625	23.88	-9.58	0.22	-
1635	23.81	-13.37	-0.42	-
1636	23.81	-12.8	-0.34	-24.5
1648	23.74	-12.14	-0.15	-
1680	23.54	-12.26	0.15	-
1688	23.49	-13.48	-0.08	-
1694	23.46	-13.27	-0.45	-
1716	23.33	-13.07	-0.28	-
1718	23.31	-11.82	-1.93	-25.68
1721	23.3	-12.81	-0.28	-
DS2927	Late Oligocene to early Miocene	-12.43	-4.11	-
DS2928	Late Oligocene to early Miocene	-11.63	-4.79	-
DS2929	Late Oligocene to early Miocene	-11.86	-4.09	-
DS2930	Late Oligocene to early Miocene	-11.95	-3.54	-
DS2931	Late Oligocene to early Miocene	-11.9	-3.47	-
DS2932	Late Oligocene to early Miocene	-11.78	-3.73	-
ZD110	Late Eocene	-10.46	-5.71	-
ZD115	Late Eocene	-9.81	-5.98	-
ZD120	Late Eocene	-9.72	-3.98	-
ZD125	Late Eocene	-10.45	-6.38	-
ZD130	Late Eocene	-9.84	-6.55	-
ZD135	Late Eocene	-10.8	-6.04	-
ZD140	Late Eocene	-9.88	-6.41	-

## Sheet: Shell & Limestone
Sample ID	Distance (mm)	δ13C (‰, VPDB)	δ18O (‰, VPDB)
1	0.7	1.68	-4.33
2	1.5	2.23	-5.9
3	2.15	1.73	-5.06
4	2.6	1.53	-6.44
5	3.1	1.41	-5.72
6	3.7	0.93	-7.41
7	4.25	0.68	-7.37
8	4.85	1.14	-6.44
9	5.55	0.93	-6.87
10	6.25	1.31	-4.69
11	6.9	1.21	-4.26
12	7.8	0.94	-5.08
13	8.3	1.12	-5.87
14	9.15	1.64	-5.98
15	9.8	1.67	-4.78
16	17.1	-1.15	-7.62
17	20	-1.04	-7.1
87	-	-0.49	-6.63
5304	-	-1.44	-6.54
5301	-	-1.1	-7.17
